# Supplementary material
Source: PubMed Central journal article supplement (PMC34424)
Supplement: pnas_101532998_2.pdf [file pnas_101532998_2.pdf]

**a**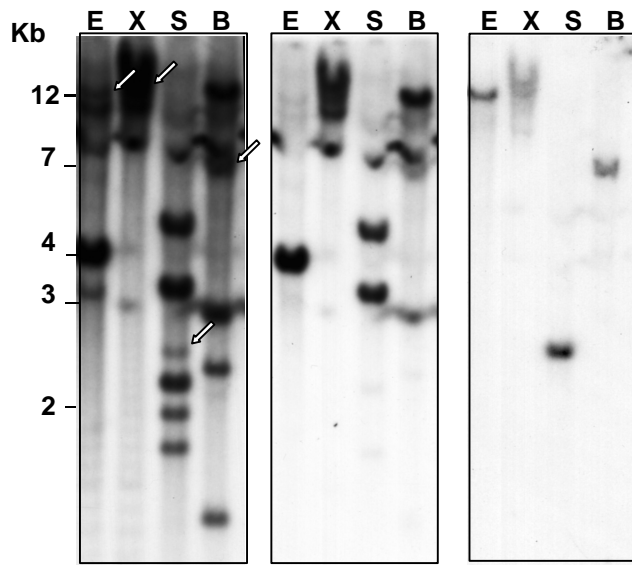

**Probe** SLP-1  
bHLH

**Stringency  
washes** 2xSSC  
RT

**Probe** SLP-1  
bHLH

**Stringency  
washes** 0.2xSSC  
60°C

**Probe** Zebrafish  
SCL 3'

**Stringency  
washes** 0.5xSSC  
RT

**b**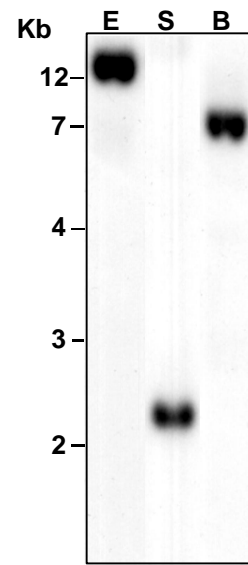

**Probe** Mouse SCL  
bHLH

**Stringency  
washes** 0.2xSSC  
65°C
