# Supplementary material
Source: PubMed Central journal article supplement (PMC34424)
Supplement: pnas_101532998_4.pdf [file pnas_101532998_4.pdf]

**a**

```

Fr_UPG : GPFYSGSGPSLELYLHRRRQELLSSOLEERKVISPPPPFAASPTLSHPFPSSQADBYG : 55
Hs_chr1 : PFPQPQHPSLDEELHRRRREIMAOLEERKVISPPPPFAASPTL-----LPTFHPD-- : 48
Hs_EST : ----- : -
Mm_EST : ----- : -

```

```

Fr_UPG : DESSNNIMGSEPPDYAGQYSPWSCPTIGSYIGSKDAKPKDVMSSTMEMMNVSK : 110
Hs_chr1 : DEDLVAGKSGSGNDYS-QYSPWSCPTIGSYIGTKDAKPKDVVAAGSVEMMNVSK : 102
Hs_EST : ----- : -
Mm_EST : ----- : -

```

```

Fr_UPG : ELRETSLEAEPRGAEVKKDDPFLIPFGPQFTVSRFGAISRTSKTSCQTTSPVQAMA : 165
Hs_chr1 : GMRDQRDLQRRRAEPTSDI-LIPFGDFTVSRFGAISRTSKTITYQGAGPMQAMA : 156
Hs_EST : ----- : -
Mm_EST : ----- : -

```

```

Fr_UPG : SSSQSONSKHFMTEYTC-GSHVWGGSYSTHQAASSOGHFNERL----- : 210
Hs_chr1 : -----MTEYTC-GSHVWGGSYSTHQAASSOGHFNER----- : 188
Hs_EST : ----- : -
Mm_EST : P-----GAPTKKSLGDSYAYLHGGWCDSPYSPANIPPOGHFLEEKMSMAEVAS : 80

```

```

Fr_UPG : ---PMAASDREQLKIELQOVNQINQOQTMRSMEREASALAGQO-----PKWP : 256
Hs_chr1 : ---PMAASDREQLKIELQOVNQINQOQTMRSMEREANTLAGQSPPPPPPKWP : 240
Hs_EST : ---PMSREEROLRLLEQLQNLHQSOOTOLGLEREANTLAGQSPPPPPPKWP : 51
Mm_EST : HGRNPLSREEROLRLLEQLQNLHQSOOTOLAGL----- : 114

```

```

Fr_UPG : AGGVSSSTVVSQSLSLHLQVEREIGKRTREMA----- : 290
Hs_chr1 : -----MISSQSLSLHLQVEREIGKRTRELSMKTSLVLT : 275
Hs_EST : -----MISSQSLSLHLEREIKRTRELSMKTSLVLT : 84
Mm_EST : ----- : -

```

**b**

```

Fr_C3HC4 : MPW---DAPQWTFLESPICCTQTEETVRRPISLGCHTVCKMCLNKLH--RKACH : 51
Hs_chr1 : MPW---DAPQWTFLESPICCTQTEETIRKPIISLGCHTVCKMCLNKLH--RKACH : 51
Hs_EST : -----ETIRKPIISLGCHTVCKMCLNKLH--RKACH : 27
Mm_EST : ----- : -
Dm_EST1 : MPW---DAPQWTFLESPICCTQTEETVRRPISLGCHTVCKMCLNKLH--RKACH : 51
Dm_EST2 : ----- : -
Ce_M142.6 : MPW---DAPQWTFLESPICCTQTEETVRRPISLGCHTVCKMCLNKLH--RKACH : 54

```

```

Fr_C3HC4 : PDQTAISTDILPVPNTALLQVLGV-----KADQVLELSEF : 91
Hs_chr1 : PDQTAISTDILPVPNTALLQVLGV-----KADQVLELSEF : 91
Hs_EST : PDQTAISTDILPVPNTALLQVLGV-----KADQVLELSEF : 66
Mm_EST : ----- : -
Dm_EST1 : PDQTAISTDILPVPNTALLQVLGV-----KADQVLELSEF : 97
Dm_EST2 : ----- : -
Ce_M142.6 : PDQTAISTDILPVPNTALLQVLGV-----KADQVLELSEF : 90

```

```

Fr_C3HC4 : DSCHYEBAKCVSEALALYLKPLSG-----GVGLSSTAQSLLSRPMQKRLVTL : 140
Hs_chr1 : DTKHYEBAKCVSEALALYLKPLSG-----GVGLSSTAQSLLSRPMQKRLVTL : 146
Hs_EST : ENKHYEBAKCVSEALALYLKPLSG-----GVGLSSTAQSLLSRPMQKRLVTL : 113
Mm_EST : ----- : -
Dm_EST1 : DSCHYEBAKCVSEALALYLKPLSG-----GVGLSSTAQSLLSRPMQKRLVTL : 138
Dm_EST2 : ----- : -
Ce_M142.6 : DSCHYEBAKCVSEALALYLKPLSG-----GVGLSSTAQSLLSRPMQKRLVTL : 135

```

```

Fr_C3HC4 : VHCQLVEEGRVVRAMRAASLGERVTVELLQHQNPQOOLSSNLMAAVRARGCQF : 194
Hs_chr1 : VHCQLVEEGRVVRAMRAASLGERVTVELLQHQNPQOOLSSNLMAAVRARGCQF : 200
Hs_EST : VHCQLVEEGRVVRAMRAASLGERVTVELLQHQNPQOOLSSNLMAAVRARGCQF : 166
Mm_EST : ----- : -
Dm_EST1 : VHCQLVEEGRVVRAMRAASLGERVTVELLQHQNPQOOLSSNLMAAVRARGCQF : 162
Dm_EST2 : VHCQLVEEGRVVRAMRAASLGERVTVELLQHQNPQOOLSSNLMAAVRARGCQF : 62
Ce_M142.6 : VHCQLVEEGRVVRAMRAASLGERVTVELLQHQNPQOOLSSNLMAAVRARGCQF : 189

```

```

Fr_C3HC4 : LGPMQDEALAKLVLLALEGSALE-----KVLVLPVQRLPFRPQASKTSIG : 243
Hs_chr1 : LGPHQN-----PQOLSSNL : 215
Hs_EST : LGP----- : 169
Mm_EST : ----- : 15
Dm_EST1 : LGP----- : -
Dm_EST2 : DKRMPVFWTRHAGGCGTGAAGCGGISAFATVLMVAVQALEKPFQASKTSIG : 117
Ce_M142.6 : LGPMQDEALAKLVLLALEGSALE-----KVLVLPVQRLPFRPQASKTSIG : 238

```

```

Fr_C3HC4 : HVVQLLYRAS---FKVTKRDESSLMQLKEEFRTYEALRREHDSQIVQIAMEAGL : 296
Hs_chr1 : AARARACQFLGFVKVTKRDESSLMQLKEEFRTYEALRREHDSQIVQIAMEAGL : 270
Hs_EST : ----- : -
Mm_EST : HVVQLLYRAS---FKVTKRDESSLMQLKEEFRTYEALRREHDSQIVQIAMEAGL : 68
Dm_EST1 : ----- : -
Dm_EST2 : HVVQLLYRAS---FKVTKRDESSLMQLKEEFRTYEALRREHDSQIVQIAMEAGL : 169
Ce_M142.6 : HVVQLLYRAS---FKVTKRDESSLMQLKEEFRTYEALRREHDSQIVQIAMEAGL : 291

```

```

Fr_C3HC4 : RIAPDQSSLLYGQDSQKSHMQSIIDKVRRLQTPASFAQSQELTIALQRTGDPA : 351
Hs_chr1 : RIAPDQSSLLYGQDSQKSHMQSIIDKVRRLQTPASFAQSQELTIALQRTGDPA : 298
Hs_EST : ----- : -
Mm_EST : RIAPDQSSLLYGQDSQKSHMQSIIDKVRRLQTPASFAQSQELTIALQRTGDPA : 120
Dm_EST1 : ----- : -
Dm_EST2 : RIAPDQSSLLYGQDSQKSHMQSIIDKVRRLQTPASFAQSQELTIALQRTGDPA : 172
Ce_M142.6 : RIAPDQSSLLYGQDSQKSHMQSIIDKVRRLQTPASFAQSQELTIALQRTGDPA : 343

```

```

Fr_C3HC4 : NLNRLRPHDLANIDPSDAPPTWEQLESLVAVRTVHGLVDPIQNHSSKKG : 406
Hs_chr1 : ----- : -
Hs_EST : ----- : -
Mm_EST : NLNRLRPHDLANIDPSDAPPTWEQLESLVAVRTVHGLVDPIQNHSSKKG : 175
Dm_EST1 : ----- : -
Dm_EST2 : ----- : -
Ce_M142.6 : VPAYRYFLTVIPCFPFAGIEHEDTSMRMISDALHQIRLLKHCSDIDRMP : 398

```

**c**

```

Fr_RT : VYEVKASSSGPYTGLLGTSDEILQVNGETVAGSLDQVRLMTRES-TASLTPARR : 60
PAR_6 : IFISRLVSGLAESTGLLHSEILEVNGIEVAKTKILDQVDMMVANHLITLTPARR : 60
TIP_40 : IFISRLVSGLAESTGLLHSEILEVNGIEVAKTKILDQVDMMVAN----- : 48

```

**d**

```

Fr_SC : MLTARSLATDSTTYAVDTVPFPRYDAIAPPGNLENITYVOYNECFNFCECCFLVKG : 60
Lm_SC : MLTARSLATDSTTYSSDTSPFPRYDAIAPPGNTPCNYTLOYNECFNFCECCFLVKG : 59

```

```

Fr_SC : MGPMGERGPPGSGGERGPLGLPGQKGTGGRGPPGAGLPAGNGLNGERGGRLG : 120
Lm_SC : MGPMGERGLPGSGGERGPLGLPGKGTGGRGPPGAGLPAGNGLNGERGGRLG : 119

```

```

Fr_SC : PCARGIPGKQTFGDOIRKCKKGERGFSGKQDGPGERCPGLNGTSPFPQDS--PGLS : 178
Lm_SC : PCARGIPGKQTFGDOIRKCKKGERGFSGKQDGPGERCPGLNGTSPFPQDS--PGLS : 179

```

```

Fr_SC : GPKGKGEQGLSCECVSGEKDKPGFKGEMGPPGLRG-----DGKRGARGEPPG : 232
Lm_SC : GPKGKGEQGLSCECVSGEKDKPGFKGEMGPPGLRG-----DGKRGARGEPPG : 233

```

```

Fr_SC : DSGARGPPGPPCARGMAGMRGERGCKGVRGPRGCKSGPESLEVRSAVSGLFSPSRFP : 292
Lm_SC : DSGARGPPGPPCARGMAGMRGERGCKGVRGPRGCKSGPESLEVRSAVSGLFSPSRFP : 293

```

```

Fr_SC : PPNLPVKFDKVFYNGEGHWDPALNKNFNTYTPGVLYFSYHITVRSPVRAALVNGVRKLR : 352
Lm_SC : PPNLPVKFDKVFYNGEGHWDPALNKNFNTYTPGVLYFSYHITVRSPVRAALVNGVRKLR : 353

```

```

Fr_SC : TRDSLYGQDIDQASNLALLHLNEDGQVWLETLRDWNQVYSSSEDDSTFSGLLYP : 412
Lm_SC : TRDSLYGQDIDQASNLALLHLNEDGQVWLETLRDWNQVYSSSEDDSTFSGLLYP : 408

```

**e**

```

Fr_PP2C : MRY-----FLLRPETLFLLCISLALWSYFFHTDEBKTVIKSSRL : 39
Hs_seq1 : MRY-----FLLRPETLFLLCISLALWSYFFHTDEBKTVIKSSRL : 39
Hs_seq2 : ----- : -
Rn_EST : MRY-----FLLRPETLFLLCISLALWSYFFHTDEBKTVIKSSRL : 39
Rn_PP2C : GA-----FLLRPETLFLLCISLALWSYFFHTDEBKTVIKSSRL : 17
Ms_PP2C : GSCSVAVSNSPVFSPSSSLCNSSETLGLSHKPSSTTTTTSSTSSSSSS : 55
Sp_PP2C : GQ-----TSSVLDKHSSSG----- : 17

```

```

Fr_PP2C : AVKMVKGVKVAEM-----QNDRLGGL : 60
Hs_seq1 : AVKMVKGVKVAEM-----QNDRLGGL : 60
Hs_seq2 : ----- : -
Rn_EST : AVKMVKGVKVAEM-----QNDRLGGL : 60
Rn_PP2C : ----- : -
Ms_PP2C : PCSSPSSPFCRLPKLPLVFTSNKDSGQNDLKKRKRPTRLNIPVSEHAFCVPA : 110
Sp_PP2C : ----- : -

```

```

Fr_PP2C : -----NVLEAEFSKTWEFKNNVAVYSIQRRDHMEDRFEVLDINKSHP-- : 106
Hs_seq1 : -----DVLEAEFSKTWEFKNNHNVAVYSIQRRDHMEDRFEVLDINKSHP-- : 106
Hs_seq2 : ----- : -
Rn_EST : -----DVLEAEFSKTWEFKNNHNVAVY : 81
Rn_PP2C : -----KNGCL-----RYGCSMOCMVEMEDAHAVICUPSGLE : 53
Ms_PP2C : TPSAVARDVVEABCD-----GYSVYCKRRREYEMEDRYTACVNLRGNNL : 155
Sp_PP2C : -----GDRNL-----HFCVSHMOCMVEMEDAHAVICUPSGLE : 54

```

```

Fr_PP2C : -----HFGIFDGHGGAARVYVAHLPEFLQOLCALEKRE--GA-----SHA : 150
Hs_seq1 : -----HFGIFDGHGGAARVYVAHLPEFLQOLCALEKRE--GA-----SHA : 121
Hs_seq2 : -----HFGIFDGHGGAARVYVAHLPEFLQOLCALEKRE--GA-----SHA : 35
Rn_EST : -----HFGIFDGHGGAARVYVAHLPEFLQOLCALEKRE--GA-----SHA : -
Rn_PP2C : -----HFGIFDGHGGAARVYVAHLPEFLQOLCALEKRE--GA-----SHA : 99
Ms_PP2C : -----HFGIFDGHGGAARVYVAHLPEFLQOLCALEKRE--GA-----SHA : 195
Sp_PP2C : PTSPFGVFDGHGGAARVYVAHLPEFLQOLCALEKRE--GA-----SHA : 95

```

```

Fr_PP2C : ILEPRLISVDRE--MLEKI : 167
Hs_seq1 : ILEPRLISVDRE--MLEKI : -
Hs_seq2 : ILEPRLISVDRE--MLEKI : 52
Rn_EST : ILEPRLISVDRE--MLEKI : -
Rn_PP2C : ILEPRLISVDRE--MLEKI : 153
Ms_PP2C : ILEPRLISVDRE--MLEKI : 243
Sp_PP2C : ILEPRLISVDRE--MLEKI : 148

```

```

Fr_PP2C : ----- : -
Hs_seq1 : ----- : -
Hs_seq2 : ----- : -
Rn_EST : ----- : -
Rn_PP2C : NRKVHFFTDHFKPSNPLEKREIQNAGGSVMTQ-----RVNGSLAVSRALGDP : 204
Ms_PP2C : GVAVALTSDHRSRETERKRIEPLGGYVDLCRQVRLGSLAVSRALGDP : 296
Sp_PP2C : NRKVHFFTDHFKPSNPLEKREIQNAGGSVMTQ-----RVNGSLAVSRALGDP : 199

```

```

Fr_PP2C : ----- : -
Hs_seq1 : ----- : -
Hs_seq2 : ----- : -
Rn_EST : ----- : -
Rn_PP2C : VHKGCTEQLVSLPEPEVHDEBSBDDOFTILACDGIWLMGNEELCDFVRSR : 259
Ms_PP2C : -----KQVTAEPETKVI-RIETEDHDLILASDGLWDRVSNQENETARQVC : 343
Sp_PP2C : DSSLPEKQIVTARQVWIR-NHDDDEFILACDGIWLMGNEELCDFVRSR : 253

```
