# Supplementary material
Source: PubMed Central journal article supplement (PMC34424)

**+RT**      **-RT**  
M   1   2   3   4   1   2   3   4

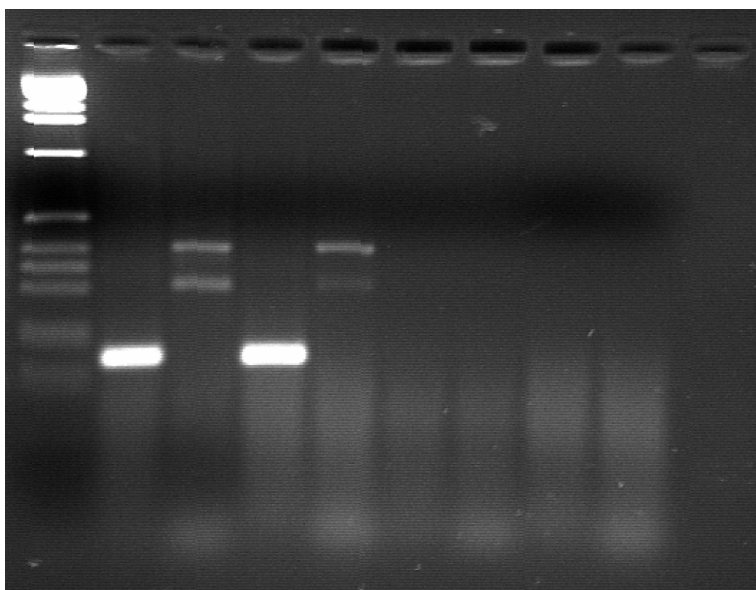

1 = testis, HPRT

2 = testis, SCL

3 = ovaries, HPRT

4 = ovaries, SCL

Supplement: pnas_101532998_6.pdf [file pnas_101532998_6.pdf]
